# Supplementary material for: Planktonic Microbes in the Gulf of Maine Area
Source: PLoS One. 2011 Jun 15;6(6):e20981. doi: 10.1371/journal.pone.0020981 (PMC3115965; doi:10.1371/journal.pone.0020981)
Supplement: Table S1 — List of microalgae and cyanobacteria in GoMA. (XLS) [file pone.0020981.s002.xls]

## Sheet: GoMA
Super Group	Division	Class	Scientific Name	References
Chromalveolates	Alveolata	Dinophyceae	Alexandrium pseudogonyaulax	40
Chromalveolates	Alveolata	Dinophyceae	Alexandrium andersonii	11
Chromalveolates	Alveolata	Dinophyceae	Alexandrium fundyense	40, 11
Chromalveolates	Alveolata	Dinophyceae	Alexandrium ostenfeldii	40
Chromalveolates	Alveolata	Dinophyceae	Alexandrium pseudogonyaulax	40
Chromalveolates	Alveolata	Dinophyceae	Alexandrium sp.	11
Chromalveolates	Alveolata	Dinophyceae	Alexandrium tamarense	34
Chromalveolates	Alveolata	Dinophyceae	Alexandrium tamarense var. excavatus	21, 2, 11, 4, 10, 31, 14, 24, 3
Chromalveolates	Alveolata	Dinophyceae	Amphidinium carterae	40, 11
Chromalveolates	Alveolata	Dinophyceae	Amphidinium oceanicum	5, 10
Chromalveolates	Alveolata	Dinophyceae	Amphidinium sp.	4, 10, 34
Chromalveolates	Alveolata	Dinophyceae	Amphidinium sphenoides	40
Chromalveolates	Alveolata	Dinophyceae	Amylax triacantha	40, 5, 6, 34, 29, 10
Chromalveolates	Alveolata	Dinophyceae	Armoured dinoflagellate	40
Chromalveolates	Alveolata	Dinophyceae	Ceratium arcticum	40, 4, 6, 5, 10, 26, 13
Chromalveolates	Alveolata	Dinophyceae	Ceratium arietinum	4, 5, 15, 10, 13
Chromalveolates	Alveolata	Dinophyceae	Ceratium furca	40, 4, 5, 30
Chromalveolates	Alveolata	Dinophyceae	Ceratium fusus	40, 11, 4, 5, 6, 9, 12, 26, 15, 8, 29, 34, 13, 30
Chromalveolates	Alveolata	Dinophyceae	Ceratium hirundinella	40, 4, 5
Chromalveolates	Alveolata	Dinophyceae	Ceratium horridum	40
Chromalveolates	Alveolata	Dinophyceae	Ceratium kofoidii	40
Chromalveolates	Alveolata	Dinophyceae	Ceratium lineatum	40, 4, 34, 6, 9, 5, 10, 15, 13
Chromalveolates	Alveolata	Dinophyceae	Ceratium longipes	40, 11, 4, 6, 9, 5, 10, 12, 14, 27, 26, 8, 29, 13
Chromalveolates	Alveolata	Dinophyceae	Ceratium macroceros	40, 4, 5, 10, 29, 26, 27
Chromalveolates	Alveolata	Dinophyceae	Ceratium minutum	40
Chromalveolates	Alveolata	Dinophyceae	Ceratium spp.	40, 4, 26, 11
Chromalveolates	Alveolata	Dinophyceae	Ceratium tripos	40, 4, 9, 5, 10, 12, 26, 28, 8, 29, 30, 34, 13
Chromalveolates	Alveolata	Dinophyceae	Ceratium tripos forma subsalsum	5, 10
Chromalveolates	Alveolata	Dinophyceae	Ceratium tripos var. atlanticum	5, 10
Chromalveolates	Alveolata	Dinophyceae	Cochlodinium helicoides	11
Chromalveolates	Alveolata	Dinophyceae	Cochlodinium spp.	40
Chromalveolates	Alveolata	Dinophyceae	Dinophysis acuminata	40, 21, 4, 9, 5, 10, 34, 13, 37
Chromalveolates	Alveolata	Dinophyceae	Dinophysis acuta	40, 6, 4, 5, 10, 34, 13, 9
Chromalveolates	Alveolata	Dinophyceae	Dinophysis arctica	4, 5, 10, 13
Chromalveolates	Alveolata	Dinophyceae	Dinophysis caudata	40
Chromalveolates	Alveolata	Dinophyceae	Dinophysis dens	40
Chromalveolates	Alveolata	Dinophyceae	Dinophysis fortii	40
Chromalveolates	Alveolata	Dinophyceae	Dinophysis hastata	40
Chromalveolates	Alveolata	Dinophyceae	Dinophysis longi-alata	5, 10, 13
Chromalveolates	Alveolata	Dinophyceae	Dinophysis norvegica	40, 4, 6, 5, 12, 27, 15, 30, 34, 13, 37
Chromalveolates	Alveolata	Dinophyceae	Dinophysis ovum	6, 5, 10, 26, 13
Chromalveolates	Alveolata	Dinophyceae	Dinophysis parvula	5
Chromalveolates	Alveolata	Dinophyceae	Dinophysis pulchella	40
Chromalveolates	Alveolata	Dinophyceae	Dinophysis recurva	6
Chromalveolates	Alveolata	Dinophyceae	Dinophysis robusta	5, 10, 13
Chromalveolates	Alveolata	Dinophyceae	Dinophysis rotundata	40, 4, 5
Chromalveolates	Alveolata	Dinophyceae	Dinophysis sphaerica	4, 5, 10, 13
Chromalveolates	Alveolata	Dinophyceae	Dinophysis spp.	40, 10, 13, 34
Chromalveolates	Alveolata	Dinophyceae	Dinophysis tripos	40
Chromalveolates	Alveolata	Dinophyceae	Diplopsalis lenticula	4, 6, 5, 13, 10
Chromalveolates	Alveolata	Dinophyceae	Dissodinium pseudolunula	40
Chromalveolates	Alveolata	Dinophyceae	Exuviaella lima	11
Chromalveolates	Alveolata	Dinophyceae	Glenodinium compressa	29
Chromalveolates	Alveolata	Dinophyceae	Glenodinium danicum	4, 5, 6, 10
Chromalveolates	Alveolata	Dinophyceae	Glenodinium foliaceum	11
Chromalveolates	Alveolata	Dinophyceae	Glenodinium sp.	10
Chromalveolates	Alveolata	Dinophyceae	Gonyaulax catenata	5
Chromalveolates	Alveolata	Dinophyceae	Gonyaulax digitale	40, 6, 10
Chromalveolates	Alveolata	Dinophyceae	Gonyaulax grindleyi	5
Chromalveolates	Alveolata	Dinophyceae	Gonyaulax orientalis	5, 10
Chromalveolates	Alveolata	Dinophyceae	Gonyaulax spinifera	40, 11, 4, 34, 9, 10
Chromalveolates	Alveolata	Dinophyceae	Gonyaulax spp.	40, 10, 34
Chromalveolates	Alveolata	Dinophyceae	Gonyaulax verior	4
Chromalveolates	Alveolata	Dinophyceae	Gymnodinium gracile	29, 5, 10, 14
Chromalveolates	Alveolata	Dinophyceae	Gymnodinium sanguineum	4
Chromalveolates	Alveolata	Dinophyceae	Gymnodinium spp.	40, 21, 2, 4, 34, 10, 14, 11
Chromalveolates	Alveolata	Dinophyceae	Gyrodinium aureolum	40
Chromalveolates	Alveolata	Dinophyceae	Gyrodinium spp.	40, 34
Chromalveolates	Alveolata	Dinophyceae	Gyrodinium uncatenatum	11
Chromalveolates	Alveolata	Dinophyceae	Heterocapsa sp.	11
Chromalveolates	Alveolata	Dinophyceae	Heterocapsa triquetra	40, 34, 5, 11, 21, 4, 10, 9, 5, 14
Chromalveolates	Alveolata	Dinophyceae	Karenia mikimotoi	25
Chromalveolates	Alveolata	Dinophyceae	Mesoporos perforatus	10, 5
Chromalveolates	Alveolata	Dinophyceae	Micracanthodinium claytonii	40
Chromalveolates	Alveolata	Dinophyceae	Minuscula bipes	40, 34
Chromalveolates	Alveolata	Dinophyceae	Noctiluca scintillans	5, 10
Chromalveolates	Alveolata	Dinophyceae	Oblea rotunda	5, 34
Chromalveolates	Alveolata	Dinophyceae	Oxytoxum gracile	5, 10, 14
Chromalveolates	Alveolata	Dinophyceae	Oxytoxum reticulatum	5, 10
Chromalveolates	Alveolata	Dinophyceae	Oxytoxum sp.	10
Chromalveolates	Alveolata	Dinophyceae	Oxytoxum variabile	40
Chromalveolates	Alveolata	Dinophyceae	Peridinium breve	4, 5, 10
Chromalveolates	Alveolata	Dinophyceae	Peridinium faeroense	6, 10
Chromalveolates	Alveolata	Dinophyceae	Peridinium hangoei	5, 10
Chromalveolates	Alveolata	Dinophyceae	Peridinium limbatum	40, 34
Chromalveolates	Alveolata	Dinophyceae	Peridinium monacanthus	5, 10
Chromalveolates	Alveolata	Dinophyceae	Peridinium pyriforme	5, 10
Chromalveolates	Alveolata	Dinophyceae	Peridinium roseum	4, 5, 6, 10
Chromalveolates	Alveolata	Dinophyceae	Peridinium rotundata	10
Chromalveolates	Alveolata	Dinophyceae	Peridinium simplex	3, 5, 10
Chromalveolates	Alveolata	Dinophyceae	Peridinium sp.	1, 4, 10, 27, 26, 3, 34, 14
Chromalveolates	Alveolata	Dinophyceae	Peridinium steini	4, 5, 10
Chromalveolates	Alveolata	Dinophyceae	Peridinium thorianum	5, 10, 34
Chromalveolates	Alveolata	Dinophyceae	Peridinium umbonatum	21, 9, 10
Chromalveolates	Alveolata	Dinophyceae	Peridinium willei	40, 34
Chromalveolates	Alveolata	Dinophyceae	Phalacroma parvulum	10
Chromalveolates	Alveolata	Dinophyceae	Polykrikos kofoidii	40
Chromalveolates	Alveolata	Dinophyceae	Polykrikos schwartzii	40
Chromalveolates	Alveolata	Dinophyceae	Polykrikos sp.	40
Chromalveolates	Alveolata	Dinophyceae	Preperidinium meuneri	40, 5
Chromalveolates	Alveolata	Dinophyceae	Prorocentrum balticum	5, 10, 13, 14
Chromalveolates	Alveolata	Dinophyceae	Prorocentrum compressum	40
Chromalveolates	Alveolata	Dinophyceae	Prorocentrum marinum	5, 10
Chromalveolates	Alveolata	Dinophyceae	Prorocentrum micans	40, 11, 4, 9, 5, 10, 17, 34
Chromalveolates	Alveolata	Dinophyceae	Prorocentrum minimum	40, 11, 5, 10, 3, 4
Chromalveolates	Alveolata	Dinophyceae	Prorocentrum redfieldii	34
Chromalveolates	Alveolata	Dinophyceae	Prorocentrum scutellum	5, 10, 3
Chromalveolates	Alveolata	Dinophyceae	Prorocentrum spp.	40
Chromalveolates	Alveolata	Dinophyceae	Prorocentrum triestinum	11
Chromalveolates	Alveolata	Dinophyceae	Protoceratium reticulatum	10, 15
Chromalveolates	Alveolata	Dinophyceae	Protoperidinium achromaticum	5, 10
Chromalveolates	Alveolata	Dinophyceae	Protoperidinium americanum	5, 10
Chromalveolates	Alveolata	Dinophyceae	Protoperidinium bipes	4, 5, 14
Chromalveolates	Alveolata	Dinophyceae	Protoperidinium brevipes	40, 4, 34, 15, 10
Chromalveolates	Alveolata	Dinophyceae	Protoperidinium cerasus	34, 6, 9, 5
Chromalveolates	Alveolata	Dinophyceae	Protoperidinium conicoides	4, 5, 10
Chromalveolates	Alveolata	Dinophyceae	Protoperidinium conicum	40, 4, 6, 9, 5, 10, 34
Chromalveolates	Alveolata	Dinophyceae	Protoperidinium conicum var. asamushi	5
Chromalveolates	Alveolata	Dinophyceae	Protoperidinium crassipes	40, 4, 12, 5, 27, 10
Chromalveolates	Alveolata	Dinophyceae	Protoperidinium denticulatum	40, 5, 10
Chromalveolates	Alveolata	Dinophyceae	Protoperidinium depressum	40, 34, 21, 4, 9, 12, 5, 10, 8, 29, 6
Chromalveolates	Alveolata	Dinophyceae	Protoperidinium divergens	40, 6, 5, 10, 12
Chromalveolates	Alveolata	Dinophyceae	Protoperidinium divergens var. renifome	30
Chromalveolates	Alveolata	Dinophyceae	Protoperidinium excentricum	40, 4, 5, 10
Chromalveolates	Alveolata	Dinophyceae	Protoperidinium globulus	4, 5, 10
Chromalveolates	Alveolata	Dinophyceae	Protoperidinium globulus var. quarnerense	10
Chromalveolates	Alveolata	Dinophyceae	Protoperidinium granii	4, 5, 6, 10
Chromalveolates	Alveolata	Dinophyceae	Protoperidinium hidemitii	40
Chromalveolates	Alveolata	Dinophyceae	Protoperidinium leonis	40
Chromalveolates	Alveolata	Dinophyceae	Protoperidinium leonis	40, 4, 34
Chromalveolates	Alveolata	Dinophyceae	Protoperidinium mite	40
Chromalveolates	Alveolata	Dinophyceae	Protoperidinium oblongum	40, 29
Chromalveolates	Alveolata	Dinophyceae	Protoperidinium obtusum	4, 5, 6, 10
Chromalveolates	Alveolata	Dinophyceae	Protoperidinium oceanicum	4, 27
Chromalveolates	Alveolata	Dinophyceae	Protoperidinium ovatum	40, 10, 4, 5, 15
Chromalveolates	Alveolata	Dinophyceae	Protoperidinium pallidum	4, 5. 10, 27, 12
Chromalveolates	Alveolata	Dinophyceae	Protoperidinium pellucidum	40, 21, 4, 6, 9, 5, 10, 15, 34
Chromalveolates	Alveolata	Dinophyceae	Protoperidinium pentagonum	4, 5, 10
Chromalveolates	Alveolata	Dinophyceae	Protoperidinium punctulatum	40
Chromalveolates	Alveolata	Dinophyceae	Protoperidinium quarnerense	5
Chromalveolates	Alveolata	Dinophyceae	Protoperidinium spp.	40
Chromalveolates	Alveolata	Dinophyceae	Protoperidinium steinii	40
Chromalveolates	Alveolata	Dinophyceae	Protoperidinium subcurvipes	5
Chromalveolates	Alveolata	Dinophyceae	Protoperidinium subinerme	5, 6, 10
Chromalveolates	Alveolata	Dinophyceae	Protoperidinium variegatum	10
Chromalveolates	Alveolata	Dinophyceae	Pyrocystis lunata	40
Chromalveolates	Alveolata	Dinophyceae	Pyrophacus horologicum	5, 10
Chromalveolates	Alveolata	Dinophyceae	Scrippsiella lachrymosa	11
Chromalveolates	Alveolata	Dinophyceae	Scrippsiella spp.	40, 11
Chromalveolates	Alveolata	Dinophyceae	Scrippsiella trochoidea	40, 6, 21, 4, 6, 10, 5, 34, 1, 11
Chromalveolates	Alveolata	Dinophyceae	Unarmoured dinoflagellate	40
Chromalveolates	Cryptophyta	Cryptophyceae	Chroomonas pauciplastida nom. nud.	11
Chromalveolates	Cryptophyta	Cryptophyceae	Chroomonas sp.	11
Chromalveolates	Cryptophyta	Cryptophyceae	Hemiselmis rufescens	11
Chromalveolates	Cryptophyta	Cryptophyceae	Rhodomonas sp.	11
Chromalveolates	Cryptophyta	Katablepharidophyceae	Leucocryptos marina	17
Chromalveolates	Haptophyta	Pavlovophyceae	Pavlova sp.	11
Chromalveolates	Haptophyta	Prymnesiophyceae	Phaeocystis pouchetii	40
Chromalveolates	Haptophyta	Prymnesiophyceae	Acanthoica acanthifera	5, 10
Chromalveolates	Haptophyta	Prymnesiophyceae	Acanthoica coronata	5, 10
Chromalveolates	Haptophyta	Prymnesiophyceae	Acanthoica monospina	5, 10
Chromalveolates	Haptophyta	Prymnesiophyceae	Braarudosphaera bigelowii	5, 10, 13
Chromalveolates	Haptophyta	Prymnesiophyceae	Calyptrosphaera oblonga	5
Chromalveolates	Haptophyta	Prymnesiophyceae	Calyptrosphaera uvella	5, 10
Chromalveolates	Haptophyta	Prymnesiophyceae	Chrysochromulina ericina	11
Chromalveolates	Haptophyta	Prymnesiophyceae	Chrysochromulina kappa	11
Chromalveolates	Haptophyta	Prymnesiophyceae	Chrysochromulina parkeae	40
Chromalveolates	Haptophyta	Prymnesiophyceae	Coccolithus pelagicus	5, 10, 14, 15
Chromalveolates	Haptophyta	Prymnesiophyceae	Coronosphaera mediterranea	5, 10
Chromalveolates	Haptophyta	Prymnesiophyceae	Diacronema sp.	11
Chromalveolates	Haptophyta	Prymnesiophyceae	Discosphaera tubifer	5, 10
Chromalveolates	Haptophyta	Prymnesiophyceae	Emiliania huxleyi	11, 14, 33
Chromalveolates	Haptophyta	Prymnesiophyceae	Lohmannosphaera	10
Chromalveolates	Haptophyta	Prymnesiophyceae	Lohmannosphaera adriatica	5, 10
Chromalveolates	Haptophyta	Prymnesiophyceae	Lohmannosphaera subclausa	5
Chromalveolates	Haptophyta	Prymnesiophyceae	Phaeocystis globosa	12
Chromalveolates	Haptophyta	Prymnesiophyceae	Phaeocystis pouchetii	4, 9, 5, 12
Chromalveolates	Haptophyta	Prymnesiophyceae	Phaeocystis sp.	10
Chromalveolates	Haptophyta	Prymnesiophyceae	Pleurochrysis carterae	11
Chromalveolates	Haptophyta	Prymnesiophyceae	Pontosphaera ovalis	5, 10
Chromalveolates	Haptophyta	Prymnesiophyceae	Pontosphaera sp.	4
Chromalveolates	Haptophyta	Prymnesiophyceae	Prymnesium parvum	11
Chromalveolates	Haptophyta	Prymnesiophyceae	Prymnesium sp.	11
Chromalveolates	Haptophyta	Prymnesiophyceae	Rhabdosphaera clavigera	5, 10
Chromalveolates	Haptophyta	Prymnesiophyceae	Rhabdosphaera tubulosa	5, 10
Chromalveolates	Haptophyta	Prymnesiophyceae	Syracosphaera apsteini	5, 10
Chromalveolates	Haptophyta	Prymnesiophyceae	Syracosphaera dentata	14
Chromalveolates	Haptophyta	Prymnesiophyceae	Syracosphaera pulchra	5, 10
Chromalveolates	Heterokontophyta	Bacillariophyceae	Achnanthes brevipes	5, 34, 11
Chromalveolates	Heterokontophyta	Bacillariophyceae	Achnanthes brevipes var. intermedia	5
Chromalveolates	Heterokontophyta	Bacillariophyceae	Achnanthes flexella	4
Chromalveolates	Heterokontophyta	Bacillariophyceae	Achnanthes longipes	5
Chromalveolates	Heterokontophyta	Bacillariophyceae	Achnanthes obliqua	5
Chromalveolates	Heterokontophyta	Bacillariophyceae	Achnanthes sp.	40
Chromalveolates	Heterokontophyta	Bacillariophyceae	Achnanthes taeniata	5, 10, 13
Chromalveolates	Heterokontophyta	Bacillariophyceae	Actinocyclus octonarius	6, 5, 10, 13, 15
Chromalveolates	Heterokontophyta	Bacillariophyceae	Actinoptychus senarius	40, 5, 13, 34, 9
Chromalveolates	Heterokontophyta	Bacillariophyceae	Amphora coffeaeformis	11
Chromalveolates	Heterokontophyta	Bacillariophyceae	Amphora lineolata	4, 5
Chromalveolates	Heterokontophyta	Bacillariophyceae	Amphora spp.	40, 34
Chromalveolates	Heterokontophyta	Bacillariophyceae	Asterionella bleakeleyi	9, 10
Chromalveolates	Heterokontophyta	Bacillariophyceae	Asterionella formosa	40, 34
Chromalveolates	Heterokontophyta	Bacillariophyceae	Asterionella gracillima	10, 13
Chromalveolates	Heterokontophyta	Bacillariophyceae	Asterionella spp.	40, 34
Chromalveolates	Heterokontophyta	Bacillariophyceae	Asterionellopsis glacialis	40, 2, 4, 5, 6, 9, 10, 12, 23, 13, 34, 11
Chromalveolates	Heterokontophyta	Bacillariophyceae	Asterionellopsis kariana	5, 10, 13
Chromalveolates	Heterokontophyta	Bacillariophyceae	Asteromphalus sp.	4
Chromalveolates	Heterokontophyta	Bacillariophyceae	Asteroplanus karianus	40
Chromalveolates	Heterokontophyta	Bacillariophyceae	Attheya longicornis	40, 11
Chromalveolates	Heterokontophyta	Bacillariophyceae	Attheya septentrionalis	40, 4, 5, 34
Chromalveolates	Heterokontophyta	Bacillariophyceae	Aulacoseira ambigua	40
Chromalveolates	Heterokontophyta	Bacillariophyceae	Aulacoseira crenulata	40
Chromalveolates	Heterokontophyta	Bacillariophyceae	Aulacoseira granulata	40
Chromalveolates	Heterokontophyta	Bacillariophyceae	Aulacoseira italica	5, 6, 10
Chromalveolates	Heterokontophyta	Bacillariophyceae	Bacillaria paxillifer	40, 1, 4, 5, 34, 29
Chromalveolates	Heterokontophyta	Bacillariophyceae	Bacteriastrum delicatulum	29
Chromalveolates	Heterokontophyta	Bacillariophyceae	Bacteriastrum fragilis	10
Chromalveolates	Heterokontophyta	Bacillariophyceae	Bacteriastrum furcatum	29
Chromalveolates	Heterokontophyta	Bacillariophyceae	Bacteriastrum spp.	40
Chromalveolates	Heterokontophyta	Bacillariophyceae	Bacterosira bathyomphala	40
Chromalveolates	Heterokontophyta	Bacillariophyceae	Bellerochea horologicalis	29
Chromalveolates	Heterokontophyta	Bacillariophyceae	Biddulphia alternans	29
Chromalveolates	Heterokontophyta	Bacillariophyceae	Caloneis brevis	5
Chromalveolates	Heterokontophyta	Bacillariophyceae	Catacombas gaillonii	4, 5, 10
Chromalveolates	Heterokontophyta	Bacillariophyceae	Centrale diatom	40
Chromalveolates	Heterokontophyta	Bacillariophyceae	Cerataulina pelagica	40, 1, 4, 12, 6, 5, 10, 29
Chromalveolates	Heterokontophyta	Bacillariophyceae	Cerataulina spp.	40
Chromalveolates	Heterokontophyta	Bacillariophyceae	Chaetoceros affinis	40, 10, 13, 29
Chromalveolates	Heterokontophyta	Bacillariophyceae	Chaetoceros affinis var. willei	40
Chromalveolates	Heterokontophyta	Bacillariophyceae	Chaetoceros atlanticus	40, 4, 12, 10, 7, 23, 29, 34
Chromalveolates	Heterokontophyta	Bacillariophyceae	Chaetoceros borealis	40, 6, 23, 26, 5, 10, 3, 13
Chromalveolates	Heterokontophyta	Bacillariophyceae	Chaetoceros brevis	40, 4, 34, 12, 6, 5, 10, 13
Chromalveolates	Heterokontophyta	Bacillariophyceae	Chaetoceros ceratosporus	4, 5, 10, 13
Chromalveolates	Heterokontophyta	Bacillariophyceae	Chaetoceros cinctus	10, 6, 5, 29, 13
Chromalveolates	Heterokontophyta	Bacillariophyceae	Chaetoceros coarctatus	29
Chromalveolates	Heterokontophyta	Bacillariophyceae	Chaetoceros compressus	40, 4, 34, 23, 7, 15, 13, 35, 12, 6, 32
Chromalveolates	Heterokontophyta	Bacillariophyceae	Chaetoceros concavicornis	40, 4, 9, 4, 10, 13, 8
Chromalveolates	Heterokontophyta	Bacillariophyceae	Chaetoceros constrictus	40, 4, 10, 12, 6, 5, 15, 30, 32, 34, 35, 13
Chromalveolates	Heterokontophyta	Bacillariophyceae	Chaetoceros contortus	40
Chromalveolates	Heterokontophyta	Bacillariophyceae	Chaetoceros convolutus	40, 4, 6, 5, 10, 7, 12, 11, 13, 32
Chromalveolates	Heterokontophyta	Bacillariophyceae	Chaetoceros convolutus var. trisetosa	40
Chromalveolates	Heterokontophyta	Bacillariophyceae	Chaetoceros crinitus	6, 5, 10
Chromalveolates	Heterokontophyta	Bacillariophyceae	Chaetoceros criophilus	12, 29, 32
Chromalveolates	Heterokontophyta	Bacillariophyceae	Chaetoceros curvisetus	1, 4, 5, 30
Chromalveolates	Heterokontophyta	Bacillariophyceae	Chaetoceros danicus	40, 4, 6, 9, 5, 10, 29, 13
Chromalveolates	Heterokontophyta	Bacillariophyceae	Chaetoceros debilis	40, 1, 22, 4, 6, 10, 12, 33, 9, 26, 8, 23, 5, 34, 13, 35
Chromalveolates	Heterokontophyta	Bacillariophyceae	Chaetoceros decipiens	40, 4, 6, 10, 12, 5, 9, 27, 14, 8, 29, 3, 30, 32, 34
Chromalveolates	Heterokontophyta	Bacillariophyceae	Chaetoceros densus	40, 6, 12, 5, 10, 26, 29, 13
Chromalveolates	Heterokontophyta	Bacillariophyceae	Chaetoceros diadema	40, 4, 6, 12, 9, 5, 10, 7, 15, 35, 13
Chromalveolates	Heterokontophyta	Bacillariophyceae	Chaetoceros didymus	40, 4, 12, 10, 11, 5, 3, 13, 34
Chromalveolates	Heterokontophyta	Bacillariophyceae	Chaetoceros difficilis	4, 5, 12, 34
Chromalveolates	Heterokontophyta	Bacillariophyceae	Chaetoceros diversus	40
Chromalveolates	Heterokontophyta	Bacillariophyceae	Chaetoceros elanicum	34
Chromalveolates	Heterokontophyta	Bacillariophyceae	Chaetoceros fragilis	5
Chromalveolates	Heterokontophyta	Bacillariophyceae	Chaetoceros furcellatus	40, 4, 10, 12, 9, 5, 13
Chromalveolates	Heterokontophyta	Bacillariophyceae	Chaetoceros imbricatus	34
Chromalveolates	Heterokontophyta	Bacillariophyceae	Chaetoceros ingolfianus	40
Chromalveolates	Heterokontophyta	Bacillariophyceae	Chaetoceros ingolfianus/furcellatus	40
Chromalveolates	Heterokontophyta	Bacillariophyceae	Chaetoceros karianus	40
Chromalveolates	Heterokontophyta	Bacillariophyceae	Chaetoceros laciniosus	4, 10, 6, 12, 9, 5, 23, 7, 15, 29, 6, 30, 32, 30, 34, 13
Chromalveolates	Heterokontophyta	Bacillariophyceae	Chaetoceros laciniosus	40
Chromalveolates	Heterokontophyta	Bacillariophyceae	Chaetoceros lauderi	4, 5
Chromalveolates	Heterokontophyta	Bacillariophyceae	Chaetoceros lorenzianus	40, 1, 4, 5, 10, 29, 34
Chromalveolates	Heterokontophyta	Bacillariophyceae	Chaetoceros minimus	4
Chromalveolates	Heterokontophyta	Bacillariophyceae	Chaetoceros mitra	40, 4, 5, 12, 29
Chromalveolates	Heterokontophyta	Bacillariophyceae	Chaetoceros muelleri	4
Chromalveolates	Heterokontophyta	Bacillariophyceae	Chaetoceros neogracile	4, 5, 9, 10, 34
Chromalveolates	Heterokontophyta	Bacillariophyceae	Chaetoceros pelagicus	5, 6, 10
Chromalveolates	Heterokontophyta	Bacillariophyceae	Chaetoceros pendulus	5
Chromalveolates	Heterokontophyta	Bacillariophyceae	Chaetoceros perpusillus	40, 4, 5
Chromalveolates	Heterokontophyta	Bacillariophyceae	Chaetoceros peruvianus	5, 29
Chromalveolates	Heterokontophyta	Bacillariophyceae	Chaetoceros pseudocrinitus	5, 11, 13
Chromalveolates	Heterokontophyta	Bacillariophyceae	Chaetoceros radicans	40, 5, 10, 15, 13, 6, 12
Chromalveolates	Heterokontophyta	Bacillariophyceae	Chaetoceros seiracanthus	5, 10, 12
Chromalveolates	Heterokontophyta	Bacillariophyceae	Chaetoceros similis	40, 4, 5, 10, 13
Chromalveolates	Heterokontophyta	Bacillariophyceae	Chaetoceros simplex	40, 1, 4, 9, 5, 10, 34, 13
Chromalveolates	Heterokontophyta	Bacillariophyceae	Chaetoceros socialis	40, 1, 4, 12, 33, 9, 10, 5, 29, 32, 34, 13, 35
Chromalveolates	Heterokontophyta	Bacillariophyceae	Chaetoceros spp.	40
Chromalveolates	Heterokontophyta	Bacillariophyceae	Chaetoceros subsecundus	4, 6, 12, 9, 5, 10, 7, 15
Chromalveolates	Heterokontophyta	Bacillariophyceae	Chaetoceros subtilis	40, 4, 5, 10, 13
Chromalveolates	Heterokontophyta	Bacillariophyceae	Chaetoceros tenuissimus	40
Chromalveolates	Heterokontophyta	Bacillariophyceae	Chaetoceros teres	40, 1, 4, 12, 6, 5, 10, 29, 13, 30
Chromalveolates	Heterokontophyta	Bacillariophyceae	Chaetoceros tortissimus	11
Chromalveolates	Heterokontophyta	Bacillariophyceae	Chaetoceros wighamii	4, 5, 10, 12
Chromalveolates	Heterokontophyta	Bacillariophyceae	Chaetoceros willei	4, 12, 5, 29, 32, 34
Chromalveolates	Heterokontophyta	Bacillariophyceae	Cocconeis placentula	5, 10
Chromalveolates	Heterokontophyta	Bacillariophyceae	Cocconeis scutellum	4, 6, 9, 5, 10
Chromalveolates	Heterokontophyta	Bacillariophyceae	Cocconeis spp.	40
Chromalveolates	Heterokontophyta	Bacillariophyceae	Corethron criophilum	40, 4, 12, 6, 9, 5, 10, 14, 29, 13, 3
Chromalveolates	Heterokontophyta	Bacillariophyceae	Corethron hystrix	40
Chromalveolates	Heterokontophyta	Bacillariophyceae	Corethron pennatum	4, 12, 6, 9, 5, 10, 14, 15, 29, 3
Chromalveolates	Heterokontophyta	Bacillariophyceae	Coscinodiscus argus	5, 10
Chromalveolates	Heterokontophyta	Bacillariophyceae	Coscinodiscus asteromphalus	12, 5, 10
Chromalveolates	Heterokontophyta	Bacillariophyceae	Coscinodiscus centralis	40, 1, 4, 10, 5, 15, 8, 30, 13, 34
Chromalveolates	Heterokontophyta	Bacillariophyceae	Coscinodiscus cinctus	5, 10
Chromalveolates	Heterokontophyta	Bacillariophyceae	Coscinodiscus concinnus	10, 12, 5, 30, 34, 13
Chromalveolates	Heterokontophyta	Bacillariophyceae	Coscinodiscus curvatulus	12, 9, 5, 10, 13
Chromalveolates	Heterokontophyta	Bacillariophyceae	Coscinodiscus denarius	12
Chromalveolates	Heterokontophyta	Bacillariophyceae	Coscinodiscus fasciculatus	30
Chromalveolates	Heterokontophyta	Bacillariophyceae	Coscinodiscus gigas	34
Chromalveolates	Heterokontophyta	Bacillariophyceae	Coscinodiscus granii	40
Chromalveolates	Heterokontophyta	Bacillariophyceae	Coscinodiscus marginatus	5
Chromalveolates	Heterokontophyta	Bacillariophyceae	Coscinodiscus oculus-iridis	10, 12
Chromalveolates	Heterokontophyta	Bacillariophyceae	Coscinodiscus perforatus	12
Chromalveolates	Heterokontophyta	Bacillariophyceae	Coscinodiscus radiatus	40, 6, 12, 5, 10, 30, 13
Chromalveolates	Heterokontophyta	Bacillariophyceae	Coscinodiscus spp.	40, 12, 11, 23, 9, 5, 10, 34
Chromalveolates	Heterokontophyta	Bacillariophyceae	Coscinodiscus subbulliens	5, 6, 12
Chromalveolates	Heterokontophyta	Bacillariophyceae	Coscinodiscus subtilis	12
Chromalveolates	Heterokontophyta	Bacillariophyceae	Coscinodiscus wailesii	40
Chromalveolates	Heterokontophyta	Bacillariophyceae	Coscinosira oestrupii	5, 10, 14, 13, 15
Chromalveolates	Heterokontophyta	Bacillariophyceae	Craticula cuspidata	4, 5
Chromalveolates	Heterokontophyta	Bacillariophyceae	Cyclophora tenuis	29
Chromalveolates	Heterokontophyta	Bacillariophyceae	Cyclotella comta	5
Chromalveolates	Heterokontophyta	Bacillariophyceae	Cyclotella cryptica	11
Chromalveolates	Heterokontophyta	Bacillariophyceae	Cyclotella meneghiniana	11
Chromalveolates	Heterokontophyta	Bacillariophyceae	Cyclotella spp.	40
Chromalveolates	Heterokontophyta	Bacillariophyceae	Cyclotella striata	5
Chromalveolates	Heterokontophyta	Bacillariophyceae	Cylindrotheca closterium	40, 1, 22, 4, 12, 6, 11, 9, 5, 7, 14, 8, 3, 29, 34, 13, 32
Chromalveolates	Heterokontophyta	Bacillariophyceae	Cylindrotheca fusiformis	11
Chromalveolates	Heterokontophyta	Bacillariophyceae	Cylindrotheca gracilis	40, 4, 5
Chromalveolates	Heterokontophyta	Bacillariophyceae	Cymbella sp.	4
Chromalveolates	Heterokontophyta	Bacillariophyceae	Dactyliosolen fragilissimus	40, ~11, ~4, ~6, ~10, ~23, ~9, ~5, ~3, ~34, ~13
Chromalveolates	Heterokontophyta	Bacillariophyceae	Dactyliosolen spp.	40
Chromalveolates	Heterokontophyta	Bacillariophyceae	Delphineis surirella	5, 10, 12
Chromalveolates	Heterokontophyta	Bacillariophyceae	Detonula confervacea	40, 1, 22, 4, 9, 5, 10, 14, 12, 11, 13
Chromalveolates	Heterokontophyta	Bacillariophyceae	Detonula pumila	40, 7
Chromalveolates	Heterokontophyta	Bacillariophyceae	Diatoma sp.	4
Chromalveolates	Heterokontophyta	Bacillariophyceae	Diploneis didyma	4, 5
Chromalveolates	Heterokontophyta	Bacillariophyceae	Diploneis smithii	5
Chromalveolates	Heterokontophyta	Bacillariophyceae	Diploneis spp.	40
Chromalveolates	Heterokontophyta	Bacillariophyceae	Ditylum brightwellii	40, 1, 22, 4, 11, 12, 6, 9, 10, 5, 29
Chromalveolates	Heterokontophyta	Bacillariophyceae	Endictya oceanica	5, 10, 13
Chromalveolates	Heterokontophyta	Bacillariophyceae	Entomoneis alata	4, 5, 10, 13
Chromalveolates	Heterokontophyta	Bacillariophyceae	Entomoneis paludosa var. paludosa	11
Chromalveolates	Heterokontophyta	Bacillariophyceae	Entomoneis spp.	40, 34
Chromalveolates	Heterokontophyta	Bacillariophyceae	Eucampia groenlandica	40
Chromalveolates	Heterokontophyta	Bacillariophyceae	Eucampia recta	5, 10, 13
Chromalveolates	Heterokontophyta	Bacillariophyceae	Eucampia spp.	40
Chromalveolates	Heterokontophyta	Bacillariophyceae	Eucampia zodiacus	40, 11, 4, 10, 12, 13, 35
Chromalveolates	Heterokontophyta	Bacillariophyceae	Eunotia arcus	5, 10, 12
Chromalveolates	Heterokontophyta	Bacillariophyceae	Eunotia pectinalis	34
Chromalveolates	Heterokontophyta	Bacillariophyceae	Eunotia sp.	4, 6, 34
Chromalveolates	Heterokontophyta	Bacillariophyceae	Extubocellulus spinifer	11
Chromalveolates	Heterokontophyta	Bacillariophyceae	Fallacia pygmaea	5
Chromalveolates	Heterokontophyta	Bacillariophyceae	Fragilaria capucina	5
Chromalveolates	Heterokontophyta	Bacillariophyceae	Fragilaria constricta	4
Chromalveolates	Heterokontophyta	Bacillariophyceae	Fragilaria crotonensis	40, 4, 5, 29, 34
Chromalveolates	Heterokontophyta	Bacillariophyceae	Fragilaria islandica	40, 5, 6
Chromalveolates	Heterokontophyta	Bacillariophyceae	Fragilaria rotundissima	11
Chromalveolates	Heterokontophyta	Bacillariophyceae	Fragilaria spp.	1, 4, 23, 10, 12, 8, 30, 34
Chromalveolates	Heterokontophyta	Bacillariophyceae	Fragilaria spp.	40
Chromalveolates	Heterokontophyta	Bacillariophyceae	Fragilaria striatula	40
Chromalveolates	Heterokontophyta	Bacillariophyceae	Fragilariforma virescens	5, 6
Chromalveolates	Heterokontophyta	Bacillariophyceae	Fragilariopsis cylindrus	6, 5, 12
Chromalveolates	Heterokontophyta	Bacillariophyceae	Fragilariopsis oceanica	40, 5, 10, 12, 13
Chromalveolates	Heterokontophyta	Bacillariophyceae	Gomphonema olivaceum	4
Chromalveolates	Heterokontophyta	Bacillariophyceae	Grammatophora angulosa	40, 4, 5, 9
Chromalveolates	Heterokontophyta	Bacillariophyceae	Grammatophora marina	40, 4, 6, 9, 5, 10, 29, 34
Chromalveolates	Heterokontophyta	Bacillariophyceae	Grammatophora serpentina	40, 4, 5, 29
Chromalveolates	Heterokontophyta	Bacillariophyceae	Grammatophora spp.	40, 34
Chromalveolates	Heterokontophyta	Bacillariophyceae	Guinardia delicatula	40, 1, 22, 4, 33, 9, 5, 29, 34
Chromalveolates	Heterokontophyta	Bacillariophyceae	Guinardia flaccida	40, 1, 4, 33, 10, 5, 12, 14, 15, 23, 27, 26, 8, 29, 35, 3, 34
Chromalveolates	Heterokontophyta	Bacillariophyceae	Guinardia striata	40, 9, 4, 27
Chromalveolates	Heterokontophyta	Bacillariophyceae	Gyrosigma acuminatum	4, 5
Chromalveolates	Heterokontophyta	Bacillariophyceae	Gyrosigma attenuatum	4, 5, 6
Chromalveolates	Heterokontophyta	Bacillariophyceae	Gyrosigma balticum	40, 4, 5, 10, 34, 32, 6
Chromalveolates	Heterokontophyta	Bacillariophyceae	Gyrosigma distortum	4, 34
Chromalveolates	Heterokontophyta	Bacillariophyceae	Gyrosigma fasciola	40, 4, 5, 34, 6, 10, 32
Chromalveolates	Heterokontophyta	Bacillariophyceae	Gyrosigma macrum	4, 5
Chromalveolates	Heterokontophyta	Bacillariophyceae	Gyrosigma prolongatum	40
Chromalveolates	Heterokontophyta	Bacillariophyceae	Gyrosigma spp.	40
Chromalveolates	Heterokontophyta	Bacillariophyceae	Gyrosigma tenuissimum	40
Chromalveolates	Heterokontophyta	Bacillariophyceae	Gyrosigma wansbeckii	34
Chromalveolates	Heterokontophyta	Bacillariophyceae	Gyrosigma wormleyi	4
Chromalveolates	Heterokontophyta	Bacillariophyceae	Hannaea sp.	4
Chromalveolates	Heterokontophyta	Bacillariophyceae	Haslea crucigera	5
Chromalveolates	Heterokontophyta	Bacillariophyceae	Helicotheca tamesis	40, 5, 10
Chromalveolates	Heterokontophyta	Bacillariophyceae	Hemiaulus hauckii	5, 10
Chromalveolates	Heterokontophyta	Bacillariophyceae	Isthmia nervosa	4, 5
Chromalveolates	Heterokontophyta	Bacillariophyceae	Lauderia annulata	40, 4, 5, 7, 16, 1, 12, 10, 9, 8
Chromalveolates	Heterokontophyta	Bacillariophyceae	Lennoxia faveolata	40
Chromalveolates	Heterokontophyta	Bacillariophyceae	Leptocylindrus danicus	40, 1, 4, 10, 9, 23, 7, 29, 14, 15, 3, 34, 13, 35
Chromalveolates	Heterokontophyta	Bacillariophyceae	Leptocylindrus mediterraneus	40, 5, 10, 13
Chromalveolates	Heterokontophyta	Bacillariophyceae	Leptocylindrus minimus	40, 4, 33, 9, 23, 5, 10, 3, 34, 13
Chromalveolates	Heterokontophyta	Bacillariophyceae	Leptocylindrus sp.	12
Chromalveolates	Heterokontophyta	Bacillariophyceae	Licmophora abbreviata	40, 5, 9, 10, 29
Chromalveolates	Heterokontophyta	Bacillariophyceae	Licmophora flabellata	40, 4, 5, 29
Chromalveolates	Heterokontophyta	Bacillariophyceae	Licmophora juergensii	5, 10, 12
Chromalveolates	Heterokontophyta	Bacillariophyceae	Licmophora lyngbyei	5, 9, 10, 29
Chromalveolates	Heterokontophyta	Bacillariophyceae	Licmophora paradoxa	11
Chromalveolates	Heterokontophyta	Bacillariophyceae	Lithodesmium undulatum	40, 4, 5
Chromalveolates	Heterokontophyta	Bacillariophyceae	Mediopyxis helysia	40
Chromalveolates	Heterokontophyta	Bacillariophyceae	Melosira ambigua	40
Chromalveolates	Heterokontophyta	Bacillariophyceae	Melosira arctica	5
Chromalveolates	Heterokontophyta	Bacillariophyceae	Melosira borreri	4, 6, 5, 12, 8, 32
Chromalveolates	Heterokontophyta	Bacillariophyceae	Melosira crenulata	6, 5, 10, 32
Chromalveolates	Heterokontophyta	Bacillariophyceae	Melosira granulata	40, 5, 34
Chromalveolates	Heterokontophyta	Bacillariophyceae	Melosira hyperborea	5
Chromalveolates	Heterokontophyta	Bacillariophyceae	Melosira lineata	5
Chromalveolates	Heterokontophyta	Bacillariophyceae	Melosira monoliformis	40, 4, 6, 5, 12, 8, 34
Chromalveolates	Heterokontophyta	Bacillariophyceae	Melosira nummuloides	40, 1, 4, 5, 11, 34
Chromalveolates	Heterokontophyta	Bacillariophyceae	Melosira spp.	40
Chromalveolates	Heterokontophyta	Bacillariophyceae	Melosira varians	34
Chromalveolates	Heterokontophyta	Bacillariophyceae	Membraneis challengeri	40
Chromalveolates	Heterokontophyta	Bacillariophyceae	Meridion circulare	4, 34
Chromalveolates	Heterokontophyta	Bacillariophyceae	Meuniera membranacea	4
Chromalveolates	Heterokontophyta	Bacillariophyceae	Minidiscus trioculatus	11
Chromalveolates	Heterokontophyta	Bacillariophyceae	Nanofrustulium shiloi	11
Chromalveolates	Heterokontophyta	Bacillariophyceae	Navicula angelica var. minuta	4
Chromalveolates	Heterokontophyta	Bacillariophyceae	Navicula aspera	5
Chromalveolates	Heterokontophyta	Bacillariophyceae	Navicula crucicula	4
Chromalveolates	Heterokontophyta	Bacillariophyceae	Navicula digito-radiata	5
Chromalveolates	Heterokontophyta	Bacillariophyceae	Navicula directa	5, 12
Chromalveolates	Heterokontophyta	Bacillariophyceae	Navicula dissipata	5
Chromalveolates	Heterokontophyta	Bacillariophyceae	Navicula distans	5, 10, 13
Chromalveolates	Heterokontophyta	Bacillariophyceae	Navicula frigida	12
Chromalveolates	Heterokontophyta	Bacillariophyceae	Navicula gelida	12
Chromalveolates	Heterokontophyta	Bacillariophyceae	Navicula grevilleana	4
Chromalveolates	Heterokontophyta	Bacillariophyceae	Navicula pelliculosa	11
Chromalveolates	Heterokontophyta	Bacillariophyceae	Navicula perminuta	11
Chromalveolates	Heterokontophyta	Bacillariophyceae	Navicula retusa	4, 5
Chromalveolates	Heterokontophyta	Bacillariophyceae	Navicula rhynchocephala	4, 5, 34
Chromalveolates	Heterokontophyta	Bacillariophyceae	Navicula salinarum	1, 4, 5
Chromalveolates	Heterokontophyta	Bacillariophyceae	Navicula spp.	40, 1, 22, 6, 23, 5, 10, 8, 12, 34
Chromalveolates	Heterokontophyta	Bacillariophyceae	Navicula tripunctata	4
Chromalveolates	Heterokontophyta	Bacillariophyceae	Navicula vanhoeffenii	4, 5, 10, 13
Chromalveolates	Heterokontophyta	Bacillariophyceae	Neodenticula seminae	40
Chromalveolates	Heterokontophyta	Bacillariophyceae	Nitzschia angularis	4, 5
Chromalveolates	Heterokontophyta	Bacillariophyceae	Nitzschia bilobata	4, 5, 32
Chromalveolates	Heterokontophyta	Bacillariophyceae	Nitzschia brebissonii	5, 6
Chromalveolates	Heterokontophyta	Bacillariophyceae	Nitzschia brevirostris	11
Chromalveolates	Heterokontophyta	Bacillariophyceae	Nitzschia clausii	4
Chromalveolates	Heterokontophyta	Bacillariophyceae	Nitzschia fasciculata	4
Chromalveolates	Heterokontophyta	Bacillariophyceae	Nitzschia frustulum	11
Chromalveolates	Heterokontophyta	Bacillariophyceae	Nitzschia hybridaeformis	5
Chromalveolates	Heterokontophyta	Bacillariophyceae	Nitzschia insignis	4, 5
Chromalveolates	Heterokontophyta	Bacillariophyceae	Nitzschia laevis	11
Chromalveolates	Heterokontophyta	Bacillariophyceae	Nitzschia longissima	4, 5, 6, 10, 29, 34
Chromalveolates	Heterokontophyta	Bacillariophyceae	Nitzschia lorenziana var. incerta	34
Chromalveolates	Heterokontophyta	Bacillariophyceae	Nitzschia obtusa	4
Chromalveolates	Heterokontophyta	Bacillariophyceae	Nitzschia pusilla	11
Chromalveolates	Heterokontophyta	Bacillariophyceae	Nitzschia seriata	4, 12, 6, 9, 23, 7, 27, 14, 15, 29, 3, 32, 34, 35, 13
Chromalveolates	Heterokontophyta	Bacillariophyceae	Nitzschia sigma	4, 5, 6, 34, 32
Chromalveolates	Heterokontophyta	Bacillariophyceae	Nitzschia sigmoidea	4, 5
Chromalveolates	Heterokontophyta	Bacillariophyceae	Nitzschia spp.	11
Chromalveolates	Heterokontophyta	Bacillariophyceae	Nitzschia vermicularis	5
Chromalveolates	Heterokontophyta	Bacillariophyceae	Odontella aurita	40, 11
Chromalveolates	Heterokontophyta	Bacillariophyceae	Odontella mobiliensis	4, 5, 10, 12, 32
Chromalveolates	Heterokontophyta	Bacillariophyceae	Odontella obtusa	40
Chromalveolates	Heterokontophyta	Bacillariophyceae	Odontella regia	40, 4, 5, 10, 13
Chromalveolates	Heterokontophyta	Bacillariophyceae	Odontella rhombus	5, 29
Chromalveolates	Heterokontophyta	Bacillariophyceae	Odontella sinensis	40
Chromalveolates	Heterokontophyta	Bacillariophyceae	Odontella spp.	40
Chromalveolates	Heterokontophyta	Bacillariophyceae	Paralia marina	40
Chromalveolates	Heterokontophyta	Bacillariophyceae	Paralia sulcata	12, 6, 10, 9, 5, 14, 15, 23, 3, 29, 32
Chromalveolates	Heterokontophyta	Bacillariophyceae	Pennate diatom	40
Chromalveolates	Heterokontophyta	Bacillariophyceae	Phaeodactylum tricornutum	11
Chromalveolates	Heterokontophyta	Bacillariophyceae	Pinnularia ambigua	4, 5
Chromalveolates	Heterokontophyta	Bacillariophyceae	Pinnularia brebissonii	4
Chromalveolates	Heterokontophyta	Bacillariophyceae	Pinnularia elegans	5
Chromalveolates	Heterokontophyta	Bacillariophyceae	Pinnularia lata	12
Chromalveolates	Heterokontophyta	Bacillariophyceae	Pinnularia major	4, 5, 6
Chromalveolates	Heterokontophyta	Bacillariophyceae	Pinnularia spp.	40, 10
Chromalveolates	Heterokontophyta	Bacillariophyceae	Pinnularia viridis	5
Chromalveolates	Heterokontophyta	Bacillariophyceae	Pleurosigma / Gyrosigma	40
Chromalveolates	Heterokontophyta	Bacillariophyceae	Pleurosigma aestuarii	4, 5, 34
Chromalveolates	Heterokontophyta	Bacillariophyceae	Pleurosigma angulatum	40, 4, 5, 6, 10, 32, 34
Chromalveolates	Heterokontophyta	Bacillariophyceae	Pleurosigma angulatum var. strigosa	40, 4, 5, 10
Chromalveolates	Heterokontophyta	Bacillariophyceae	Pleurosigma decorum	5, 6, 10
Chromalveolates	Heterokontophyta	Bacillariophyceae	Pleurosigma elongatum	4, 6, 5, 10, 32
Chromalveolates	Heterokontophyta	Bacillariophyceae	Pleurosigma formosum	40, 4, 5, 32
Chromalveolates	Heterokontophyta	Bacillariophyceae	Pleurosigma intermedium	4, 5
Chromalveolates	Heterokontophyta	Bacillariophyceae	Pleurosigma longum	5, 12
Chromalveolates	Heterokontophyta	Bacillariophyceae	Pleurosigma marinum	1, 4
Chromalveolates	Heterokontophyta	Bacillariophyceae	Pleurosigma normanii	4, 12, 5, 10, 15, 8, 34, 13
Chromalveolates	Heterokontophyta	Bacillariophyceae	Pleurosigma spp.	40, 1, 4, 9, 10, 34, 13
Chromalveolates	Heterokontophyta	Bacillariophyceae	Pleurosigma strigilis	4, 5
Chromalveolates	Heterokontophyta	Bacillariophyceae	Pleurosigma strigosum	40
Chromalveolates	Heterokontophyta	Bacillariophyceae	Pleurosigma stuxbergii	12, 5
Chromalveolates	Heterokontophyta	Bacillariophyceae	Porosira glacialis	40, 16, 1, 4, 12, 10, 9, 4, 8
Chromalveolates	Heterokontophyta	Bacillariophyceae	Proboscia alata	40, 4, 6, 10, 12, 5, 7, 14, 15, 3, 34, 13, 29
Chromalveolates	Heterokontophyta	Bacillariophyceae	Proboscia eumorpha	40, 5, 28, 32
Chromalveolates	Heterokontophyta	Bacillariophyceae	Pseudo-nitzschia americana	40, 38, 39
Chromalveolates	Heterokontophyta	Bacillariophyceae	Pseudo-nitzschia delicatissima	40, 1, 22, 4, 9, 5, 10, 14, 15, 34, 13, 38, 39
Chromalveolates	Heterokontophyta	Bacillariophyceae	Pseudo-nitzschia delicatissima group	40
Chromalveolates	Heterokontophyta	Bacillariophyceae	Pseudo-nitzschia fraudulenta	40, 38, 39
Chromalveolates	Heterokontophyta	Bacillariophyceae	Pseudo-nitzschia multiseries	40, 4, 5, 31, 11, 38
Chromalveolates	Heterokontophyta	Bacillariophyceae	Pseudo-nitzschia pseudodelicatissima	40, 38, 39
Chromalveolates	Heterokontophyta	Bacillariophyceae	Pseudo-nitzschia pungens	40, 38, 39
Chromalveolates	Heterokontophyta	Bacillariophyceae	Pseudo-nitzschia seriata	40
Chromalveolates	Heterokontophyta	Bacillariophyceae	Pseudo-nitzschia seriata group	40, 39
Chromalveolates	Heterokontophyta	Bacillariophyceae	Pseudo-nitzschia sp.	40
Chromalveolates	Heterokontophyta	Bacillariophyceae	Pseudo-nitzschia subpacifica	40, 38, 39
Chromalveolates	Heterokontophyta	Bacillariophyceae	Pseudo-nitzschia turgidula	40
Chromalveolates	Heterokontophyta	Bacillariophyceae	Pseudosolenia calcar-avis	5, 10, 8, 29, 3
Chromalveolates	Heterokontophyta	Bacillariophyceae	Rhabdonema adriaticum	40, 5, 10, 29
Chromalveolates	Heterokontophyta	Bacillariophyceae	Rhabdonema arcuatum	4, 34, 5, 10, 12
Chromalveolates	Heterokontophyta	Bacillariophyceae	Rhabdonema arcuatum	40
Chromalveolates	Heterokontophyta	Bacillariophyceae	Rhabdonema spp.	40, 30
Chromalveolates	Heterokontophyta	Bacillariophyceae	Rhaphoneis amphiceros	5, 10, 12
Chromalveolates	Heterokontophyta	Bacillariophyceae	Rhizosolenia alata f. gracillima	30
Chromalveolates	Heterokontophyta	Bacillariophyceae	Rhizosolenia bergonii	5, 10
Chromalveolates	Heterokontophyta	Bacillariophyceae	Rhizosolenia faeroensis	11, 4, 6, 10, 9, 5, 29, 32, 14
Chromalveolates	Heterokontophyta	Bacillariophyceae	Rhizosolenia hebetata	40, 4, 6, 10, 9, 23, 5, 34, 13, 8, 32
Chromalveolates	Heterokontophyta	Bacillariophyceae	Rhizosolenia hebetata f. semispina	12, 28, 29, 27
Chromalveolates	Heterokontophyta	Bacillariophyceae	Rhizosolenia imbricata	40, 4, 6, 12, 5, 10, 13, 28, 29
Chromalveolates	Heterokontophyta	Bacillariophyceae	Rhizosolenia pungens	40
Chromalveolates	Heterokontophyta	Bacillariophyceae	Rhizosolenia setigera	40, 1, 4, 5, 8, 12, 10, 11, 30, 29
Chromalveolates	Heterokontophyta	Bacillariophyceae	Rhizosolenia spp.	40
Chromalveolates	Heterokontophyta	Bacillariophyceae	Rhizosolenia styliformis	6, 10, 4, 12, 27, 30
Chromalveolates	Heterokontophyta	Bacillariophyceae	Rhizosphenia curvata	5
Chromalveolates	Heterokontophyta	Bacillariophyceae	Rhopalodia musculus	5
Chromalveolates	Heterokontophyta	Bacillariophyceae	Scoliopleura latestriata	5
Chromalveolates	Heterokontophyta	Bacillariophyceae	Sellaphora pupula	4
Chromalveolates	Heterokontophyta	Bacillariophyceae	Skeletonema costatum sensu lato	40, 1, 22, 5, 10, 15, 6, 33, 8, 12, 9
Chromalveolates	Heterokontophyta	Bacillariophyceae	Skeletonema grethae	11
Chromalveolates	Heterokontophyta	Bacillariophyceae	Skeletonema marinoi	11
Chromalveolates	Heterokontophyta	Bacillariophyceae	Skeletonema menzelii	11
Chromalveolates	Heterokontophyta	Bacillariophyceae	Stauroneis amphoroides	11
Chromalveolates	Heterokontophyta	Bacillariophyceae	Stauroneis nobilis	4
Chromalveolates	Heterokontophyta	Bacillariophyceae	Stauroneis obliqua	5
Chromalveolates	Heterokontophyta	Bacillariophyceae	Staurophora salina	4
Chromalveolates	Heterokontophyta	Bacillariophyceae	Staurosirella pinnata	5, 11
Chromalveolates	Heterokontophyta	Bacillariophyceae	Stellarima stellaris	5, 10
Chromalveolates	Heterokontophyta	Bacillariophyceae	Stephanodiscus astraea	10, 12
Chromalveolates	Heterokontophyta	Bacillariophyceae	Stephanodiscus rotula	5
Chromalveolates	Heterokontophyta	Bacillariophyceae	Stephanopyxis appendiculata	29
Chromalveolates	Heterokontophyta	Bacillariophyceae	Stephanopyxis cf. broschii	11
Chromalveolates	Heterokontophyta	Bacillariophyceae	Stephanopyxis turris	40, 5, 10, 12
Chromalveolates	Heterokontophyta	Bacillariophyceae	Striatella delicatula	4
Chromalveolates	Heterokontophyta	Bacillariophyceae	Striatella unipunctata	40, 4, 5
Chromalveolates	Heterokontophyta	Bacillariophyceae	Surirella gemma	6, 5, 4
Chromalveolates	Heterokontophyta	Bacillariophyceae	Surirella ovalis	4, 5
Chromalveolates	Heterokontophyta	Bacillariophyceae	Surirella spp.	40, 6
Chromalveolates	Heterokontophyta	Bacillariophyceae	Synedra affinis	5
Chromalveolates	Heterokontophyta	Bacillariophyceae	Synedra biceps	40
Chromalveolates	Heterokontophyta	Bacillariophyceae	Synedra longissima	5
Chromalveolates	Heterokontophyta	Bacillariophyceae	Synedra spp.	40, 4
Chromalveolates	Heterokontophyta	Bacillariophyceae	Synedra ulna	40, 4, 5, 6
Chromalveolates	Heterokontophyta	Bacillariophyceae	Tabellaria fenestrata	4, 5, 10, 6
Chromalveolates	Heterokontophyta	Bacillariophyceae	Tabellaria flocculosa	4
Chromalveolates	Heterokontophyta	Bacillariophyceae	Tabellaria spp.	40
Chromalveolates	Heterokontophyta	Bacillariophyceae	Thalassionema frauenfeldii	4, 5, 10
Chromalveolates	Heterokontophyta	Bacillariophyceae	Thalassionema nitzschioides	40, 1, 4, 5, 10, 22, 23, 12, 8, 15
Chromalveolates	Heterokontophyta	Bacillariophyceae	Thalassiosira aestivalis	16
Chromalveolates	Heterokontophyta	Bacillariophyceae	Thalassiosira angulata	40, 1, 5, 6, 9, 10, 14, 15, 23
Chromalveolates	Heterokontophyta	Bacillariophyceae	Thalassiosira auguste-lineata	40, 1, 6, 12, 23, 9, 5, 10, 13
Chromalveolates	Heterokontophyta	Bacillariophyceae	Thalassiosira baltica	40, 12
Chromalveolates	Heterokontophyta	Bacillariophyceae	Thalassiosira bioculata	10, 12
Chromalveolates	Heterokontophyta	Bacillariophyceae	Thalassiosira eccentrica	40, 12, 6, 10, 15, 13, 1, 5
Chromalveolates	Heterokontophyta	Bacillariophyceae	Thalassiosira gravida	40, 1, 5, 6, 7, 9, 10, 15, 16, 22, 23, 26
Chromalveolates	Heterokontophyta	Bacillariophyceae	Thalassiosira hyalina	40, 1, 5, 10, 11, 23, 12
Chromalveolates	Heterokontophyta	Bacillariophyceae	Thalassiosira leptopus	6, 5, 10, 12
Chromalveolates	Heterokontophyta	Bacillariophyceae	Thalassiosira nordenskioeldii	40, 11
Chromalveolates	Heterokontophyta	Bacillariophyceae	Thalassiosira oestrupii	40
Chromalveolates	Heterokontophyta	Bacillariophyceae	Thalassiosira pacifica	40
Chromalveolates	Heterokontophyta	Bacillariophyceae	Thalassiosira punctifera	40
Chromalveolates	Heterokontophyta	Bacillariophyceae	Thalassiosira rotula	40, 4
Chromalveolates	Heterokontophyta	Bacillariophyceae	Thalassiosira spp.	40, 10, 12, 14, 23, 26
Chromalveolates	Heterokontophyta	Bacillariophyceae	Thalassiosira subtilis	40, 5, 10
Chromalveolates	Heterokontophyta	Bacillariophyceae	Thalassiosira weissflogii	11
Chromalveolates	Heterokontophyta	Bacillariophyceae	Thalassiothrix longissima	40, 4, 10, 15, 30, 26, 12
Chromalveolates	Heterokontophyta	Bacillariophyceae	Toxarium undulatum	5
Chromalveolates	Heterokontophyta	Bacillariophyceae	Trachyneis aspera	5
Chromalveolates	Heterokontophyta	Bacillariophyceae	Triceratium alternans	40, 10
Chromalveolates	Heterokontophyta	Bacillariophyceae	Triceratium sp.	4
Chromalveolates	Heterokontophyta	Bacillariophyceae	Trigonium arcticum	4, 5
Chromalveolates	Heterokontophyta	Bacillariophyceae	Tropidoneis antarctica polyplasta	7
Chromalveolates	Heterokontophyta	Bacillariophyceae	Tryblionella acuminata	34
Chromalveolates	Heterokontophyta	Bacillariophyceae	Tryblionella compressa	40
Chromalveolates	Heterokontophyta	Bacillariophyceae	Tryblionella littoralis	4, 5
Chromalveolates	Heterokontophyta	Bacillariophyceae	Ulnaria delicatissima var. angustissima	40
Chromalveolates	Heterokontophyta	Bacillariophyceae	Urosolenia eriensis	4, 34
Chromalveolates	Heterokontophyta	Bacillariophyceae	Urosolenia longiseta	34
Chromalveolates	Heterokontophyta	Chrysophyceae	Chrysococcus cingulum	17
Chromalveolates	Heterokontophyta	Chrysophyceae	Chrysophaerella longispina	5
Chromalveolates	Heterokontophyta	Chrysophyceae	Cyclonexis annularis	5
Chromalveolates	Heterokontophyta	Chrysophyceae	Dinobryon bavaricum	4
Chromalveolates	Heterokontophyta	Chrysophyceae	Dinobryon divergens	34
Chromalveolates	Heterokontophyta	Chrysophyceae	Dinobryon sertularia	4, 5, 34
Chromalveolates	Heterokontophyta	Chrysophyceae	Dinobryon sociale	34
Chromalveolates	Heterokontophyta	Chrysophyceae	Dinobryon spp.	40, 34
Chromalveolates	Heterokontophyta	Chrysophyceae	Dinobryon stipitatum	34
Chromalveolates	Heterokontophyta	Chrysophyceae	Ochromonas sp.	11
Chromalveolates	Heterokontophyta	Chrysophyceae	Uroglenopsis americana	34
Chromalveolates	Heterokontophyta	Dictyochophyceae	Apedinella sp.	40
Chromalveolates	Heterokontophyta	Dictyochophyceae	Dictyocha fibula	40, 4, 5, 10, 15, 29
Chromalveolates	Heterokontophyta	Dictyochophyceae	Dictyocha fibula var. messaneis	10
Chromalveolates	Heterokontophyta	Dictyochophyceae	Dictyocha fibula var. messaneis forma spinosa	10
Chromalveolates	Heterokontophyta	Dictyochophyceae	Dictyocha speculum	40, 34, 1, 4, 6, 10, 9, 5, 11, 29, 3, 15
Chromalveolates	Heterokontophyta	Dictyochophyceae	Pseudopediella sp.	11
Chromalveolates	Heterokontophyta	Eustigmatophyceaae	Nannochloropsis granulata	11
Chromalveolates	Heterokontophyta	Pelagophyceae	Pelagococcus sp.	11
Chromalveolates	Heterokontophyta	Synurophyceae	Synura uvella	5, 34
Chromalveolates	Heterokontophyta	Xanthophyceae	Centritractus sp.	4
Chromalveolates	Rhizaria	Cercozoa	Ebria antiqua	10, 15
Chromalveolates	Rhizaria	Cercozoa	Ebria tripartita	40, 6, 10, 34
Eubacteria	Cyanophyta	Cyanophyceae	Anabaena sp.	5, 34
Eubacteria	Cyanophyta	Cyanophyceae	Chroococcus sp.	6
Eubacteria	Cyanophyta	Cyanophyceae	Gloeocapsa sp.	5, 10
Eubacteria	Cyanophyta	Cyanophyceae	Lyngbya aestuarii	11
Eubacteria	Cyanophyta	Cyanophyceae	Merismopedia elegans	4, 5
Eubacteria	Cyanophyta	Cyanophyceae	Merismopedia glauca	34
Eubacteria	Cyanophyta	Cyanophyceae	Merismopedia punctata	4, 5
Eubacteria	Cyanophyta	Cyanophyceae	Merismopedia quadruplicata	34
Eubacteria	Cyanophyta	Cyanophyceae	Merismopedia spp.	34
Eubacteria	Cyanophyta	Cyanophyceae	Microcystis sp. (incl. Anacystis)	40, 34
Eubacteria	Cyanophyta	Cyanophyceae	Oscillatoria curviceps	36
Eubacteria	Cyanophyta	Cyanophyceae	Oscillatoria woronichini	11
Eubacteria	Cyanophyta	Cyanophyceae	Phormidium formosum	36
Eubacteria	Cyanophyta	Cyanophyceae	Phormidium limosum	36
Eubacteria	Cyanophyta	Cyanophyceae	Phormidium persicinum	11
Eubacteria	Cyanophyta	Cyanophyceae	Phormidium tergestinum	36
Eubacteria	Cyanophyta	Cyanophyceae	Planktothrix agardhii	36
Eubacteria	Cyanophyta	Cyanophyceae	Rhabdoderma lineare	36
Eubacteria	Cyanophyta	Cyanophyceae	Spirulina major	4, 5
Eubacteria	Cyanophyta	Cyanophyceae	Spirulina subsalsa	4
Eubacteria	Cyanophyta	Cyanophyceae	Synechococcus spp. sensu lato	11, 16, 19, 18,
Eubacteria	Cyanophyta	Cyanophyceae	Trichodesmium sp.	27
Excavata	Euglenophyta	Euglenophyceae	Euglena sp.	40
Excavata	Euglenophyta	Euglenophyceae	Eutreptia / Eutreptiella	40
Excavata	Euglenophyta	Euglenophyceae	Eutreptia lanowii	5, 10, 34
Excavata	Euglenophyta	Euglenophyceae	Eutreptia sp.	34, 1
Excavata	Euglenophyta	Euglenophyceae	Eutreptia viridis	14
Excavata	Euglenophyta	Euglenophyceae	Eutreptiella pomquetensis	11
Plantae	Charophyta	Zygnematophyceae	Arthrodesmus	4
Plantae	Charophyta	Zygnematophyceae	Closterium dianae	4, 5
Plantae	Charophyta	Zygnematophyceae	Closterium moniliferum	34
Plantae	Charophyta	Zygnematophyceae	Cosmarium sp.	34
Plantae	Charophyta	Zygnematophyceae	Desmidium aptogonum	34
Plantae	Charophyta	Zygnematophyceae	Euastrum sp.	34
Plantae	Charophyta	Zygnematophyceae	Micrasterias	4, 34
Plantae	Charophyta	Zygnematophyceae	Micrasterias foliacea	5
Plantae	Charophyta	Zygnematophyceae	Sphaerozosma sp.	5m 6
Plantae	Charophyta	Zygnematophyceae	Spirogyra spp.	34, 5, 6
Plantae	Charophyta	Zygnematophyceae	Staurastrum	4, 5, 34
Plantae	Charophyta	Zygnematophyceae	Staurastrum pardoxum	34
Plantae	Charophyta	Zygnematophyceae	Stauridium tetras	34
Plantae	Charophyta	Zygnematophyceae	Staurodesmus spp.	40
Plantae	Charophyta	Zygnematophyceae	Xanthidium antilopaeum	6
Plantae	Chlorophyta	Chlorophyceae	Acroblaste reinschii	11
Plantae	Chlorophyta	Chlorophyceae	Ankistrodesmus sp.	4, 5
Plantae	Chlorophyta	Chlorophyceae	Brachiomonas	11
Plantae	Chlorophyta	Chlorophyceae	Carteria sp.	5
Plantae	Chlorophyta	Chlorophyceae	Chlamydomonas	11
Plantae	Chlorophyta	Chlorophyceae	Chlorosarcinopsis halophilia	20
Plantae	Chlorophyta	Chlorophyceae	Eudorina sp.	4
Plantae	Chlorophyta	Chlorophyceae	Gonium pectorale	34
Plantae	Chlorophyta	Chlorophyceae	Kirchneriella obesa	5, 6
Plantae	Chlorophyta	Chlorophyceae	Kirchneriella obesa var. major	34
Plantae	Chlorophyta	Chlorophyceae	Pediastrum duplex	4, 5
Plantae	Chlorophyta	Chlorophyceae	Pediastrum sp.	9, 34
Plantae	Chlorophyta	Chlorophyceae	Quadrigula chodati	34
Plantae	Chlorophyta	Chlorophyceae	Scenedesmus communis	4, 5
Plantae	Chlorophyta	Chlorophyceae	Scenedesmus dimorphus	4, 5
Plantae	Chlorophyta	Chlorophyceae	Scenedesmus sp.	34
Plantae	Chlorophyta	Chlorophyceae	Schizochlamydella capsulata	20
Plantae	Chlorophyta	Chlorophyceae	Stigeoclonium lubricum	34
Plantae	Chlorophyta	Chlorophyceae	Tetraedron sp.	4, 34
Plantae	Chlorophyta	Chlorophyceae	Polyasterias problematica	40
Plantae	Chlorophyta	Prasinophyceae	Halosphaera viridis	4, 12, 26, 5, 15
Plantae	Chlorophyta	Prasinophyceae	Micromonas pusilla	11
Plantae	Chlorophyta	Prasinophyceae	Micromonas sp.	11
Plantae	Chlorophyta	Prasinophyceae	Ostreococcus sp.	11
Plantae	Chlorophyta	Prasinophyceae	Pycnococcus provasolii	11
Plantae	Chlorophyta	Prasinophyceae	Pyramimonas sp.	11, 17, 34
Plantae	Chlorophyta	Prasinophyceae	Tetraselmis levis	11
Plantae	Chlorophyta	Prasinophyceae	Tetraselmis sp.	11
Plantae	Chlorophyta	Trebouxiophyceae	Chlorella sp.	11
Plantae	Chlorophyta	Trebouxiophyceae	Crucigenia quadrata	4, 34
Plantae	Chlorophyta	Trebouxiophyceae	Dictyosphaerium pulchellum	5
Plantae	Chlorophyta	Trebouxiophyceae	Nannochloris	11
Plantae	Chlorophyta	Trebouxiophyceae	Oocystis minuta	20
Plantae	Chlorophyta	Trebouxiophyceae	Oocystis sp.	6
Plantae	Chlorophyta	Trebouxiophyceae	Pachycladon umbricus	34
Plantae	Chlorophyta	Trebouxiophyceae	Selenastrum sp.	4
Plantae	Chlorophyta	Ulvophyceae	Acrochaete leptochaete	11
Plantae	Chlorophyta	Ulvophyceae	Acrochaete repens	11
Plantae	Chlorophyta	Ulvophyceae	Bolbocoleon piliferum	11
Plantae	Chlorophyta	Ulvophyceae	Entocladia tenuis	11
Plantae	Chlorophyta	Ulvophyceae	Epicladia perforans	11
Plantae	Chlorophyta	Ulvophyceae	Gomontia polyrhiza	11
Plantae	Chlorophyta	Ulvophyceae	Ochlochaete hystrix	11
Plantae	Chlorophyta	Ulvophyceae	Ochlochaete sp.	11
Plantae	Chlorophyta	Ulvophyceae	Phaeophila dendroides	11
Plantae	Chlorophyta	Ulvophyceae	Tellamia contorta	11
Plantae	Rhodophyta	Porphyridiophyceae	Porphyridium cruentum	11

## Sheet: References
Number	Reference
1	Cura, J.J. 1981. Physical and biological factors affecting phytoplankton growth and seasonal growth and succession in the Damariscotta River estuary (Ph.D. Thesis). Univ. Microfilms Internat., Ann Arbor, MI.
2	Incze, L. and Cody, R.H. 1980. The size distribution of particulates and phytoplankton in the Damariscotta River estuary, Lincoln County, Maine. Me. Sea Grant Tech. Report #62.
3	Lillick, L.C. 1937. Seasonal studies of the phytoplankton off Woods Hole, Ma. Biol. Bull. 73:488-503.
4	McAlice, B.J. and Jones, F.D. 1978. Section 8.3 Net Phytoplankton. Environmental Surveillance and Studies. Maine Yankee Atomic Power Company. pp. 8.3.1-8.3.32.
5	McAlice, B.J. 1975. Preliminary checklist of planktonic microalgae from the Gulf of Maine. Maine Sea Grant Information Leaflet #9, March 1975. (Ira C. Darling Center Ref. no. 75-1).
6	Burkholder, P.R. 1933. A study of the phytoplankton of Frenchman's Bay and Penobscot Bay, Maine. Int. Rev. Ges. Hydrobiol. 28:262-284.
7	Hulburt, E.M. 1964. Succession and diversity in the plankton flora of the western North Atlantic. Bull. Mar. Sci. Gulf Caribbean 14(1):34-44.
8	Normandeau Associates, Inc., Manchester, NH. Seabrook Ecological Study. 1972. Plankton distribution in the estuary and coastal waters in the vicinity of Hampton-Seabrook, NH. Tech. Report IV-4.
9	Gowen, A.W. and Mulligan, H.F. 1978. A photographic guide to the phytoplankton of the coastal waters of the Gulf of Maine. Shoals Marine Lab., Cornell University, Ithaca, NY.
10	Lillick, L.C. 1940. Phytoplankton and planktonic protozoa of the offshore waters of the Gulf of Maine. Part II. Qualitative composition of the planktonic flora. Trans. Amer. Phil. Soc. Vol. 31(N.S.), Part 3.
11	Provasoli-Guillard Center for the Culture of Marine Phytoplankton, Bigelow Laboratory for Ocean Sciences. Catalog of Strains (unpublished). W. Boothbay Harbor, ME.
12	Bigelow, H.B. 1926. Plankton of the offshore waters of the Gulf of Maine. Bull. Bur. Fish. 40:1-509.
13	Gran, H.H. and Braarud, T. 1935. A quantitative study of the phytoplankton in the Bay of Fundy and the Gulf of Maine. J. Biol. Bd. Canada 1(5):279-467.
14	Braarud, T. 1934. A note on the phytoplankton of the Gulf of Maine in the summer of 1933. Biol. Bull. 67:76-82.
15	Gran, H.H. 1933. Studies on the biology and chemistry of the Gulf of Maine. II. Distribution of phytoplankton in August, 1932. Biol. Bull. 64:159-182.
16	Shapiro, L.P. and Haugen, E.M. 1988. Seasonal distribution and temperature tolerance of Synechococcus in Boothbay Harbor, ME. Estuarine, Coastal and Shelf Science 26:517-525.
17	Lackey, J.B., VanderBorgh, G. Jr. and Glancy, J.B. 1949. General character of plankton organisms in waters overlying shellfish producing grounds. Proc. Nat. Shell-fish Assoc. 1949: 1-5.
18	Glover, H.E., Phinney, D.A. and Yentsch, C.S. 1985. Photosynthetic characteristics of picoplankton compared with those of larger phytoplankton populations, in various water masses in the Gulf of Maine. Biol. Oceanogr. 3(3).
19	Murphy, L.S. and Haugen, E.M. 1985. The distribution and abundance of phototrophic ultraplankton in the North Atlantic. Limnol. Oceanogr. 30(1):47-58.
20	Guillard, R.R.L., Bold, H,C. and MacEntee, F.J. 1975. Four new unicellular chlorophycean algae from mixohaline habitats. Phycologia 14(1):13-24.
21	Incze, L. and Yentsch, C.M. 1981. Stable density fronts and dinoflagellate patches in a tidal estuary. Estuarine, Coastal and Shelf Science 13:547-556.
22	Carlson, D.J., Townsend, D.W., Hilyard, A.L. and Eaton, J.F. 1984. Effect of an intertidal mudflat on plankton of the overlying water column. Can. J. Fish. Aquat. Sci. 41(10):1523-1528.
23	Sears, M. 1941. Notes on the phytoplankton on Georges Bank in 1940. J. Marine Res. 4(3).
24	Mulligan, H.F. 1973. Probable causes for the 1972 red tide in the Cape Ann region of the Gulf of Maine. J. Fish. Res. Bd. Can. 30:1363-1366.
25	Campbell, D.E. 1989. The Maquoit Bay shellfish kill of 1988: An ecological tragedy. Research reference document Maine Department of Marine Resources.
26	Bigelow, H.B. 1917. Explorations of the coast water between Cape Cod and Halifax in 1914 and 1915, by the U.S. Fisheries schooner Grampus. Oceanography and Plankton. Bull. Mus. Comp. Zool. 61(8).
27	Bigelow, H.B. 1915. Exploration of the coast water between Nova Scotia and Chesapeake Bay, July and August, 1913, by the U.S. Fisheries schooner Grampus. Oceanography and Plankton. Bull. Mus. Comp. Zool. 59(4).
28	Bigelow, H.B. 1922. Exploration of the coastal water off the northeastern United States in 1916 by the U.S. Fisheries schooner Grampus. Bull. Mus. Comp. Zool. 65(5).
29	Fish, C.J. 1925. Seasonal distribution of the plankton of the Woods Hole region. Bull. Bur. Fish. 61:91-180.
30	McMurrich, J.P. 1917. The winter plankton in the neighbourhood of St. Andrews, 1914-1915. Cont. to Can. Biol. 1915-1916. Supp. 6, Ann. Rep., Dept. Naval Services, Fisheries Branch, pp. 1-8.
31	Shumway, S.E. 1990. A review of the effects of algal blooms on shellfish and aquaculture. J. World Aquacultural Soc. 21(2).
32	Fritz, C.W. 1921. Plankton diatoms, their distribution and bathymetric range in St. Andrews waters. Cont. Canadian Biol. and Fish. 1918-1920:49-62.
33	Hulburt, E.M. and Corwin, N. 1970. Relation of the phytoplankton to turbulence and nutrient renewal in Casco Bay, Maine. J. Fish. Res. Bd. Canada. 27:2081-2090.
34	Flahive, W. and Haugen, E. 1979. Presumpscot River Estuary Study for S.D.Warren. Portland, The Research Institute of the Gulf of Maine. (TRIGOM) 1979. 1-30 pp.
35	Davidson, V.M. 1934. Fluctuations in the abundance of planktonic diatoms in the Passamaquoddy region, New Brunswick from 1924-1931. Cont. Canadian Biol. and Fish., N.S., Vol. 8(28):357-407.
36	Flahive, W. and Haugen, E. 1979. Presumpscot River Estuary Study for S.D.Warren. Portland, The Research Institute of the Gulf of Maine. (TRIGOM) 1979. 1-30 pp.
37	Jacobson, D.M. and Andersen, R.A. 1994. The discovery of mixotrophy in photosynthetic species of Dinophysis (Dinophyceae): light and ultrastructural observations of food vacuoles in Dinophysis accuminata, D. norvegica and two heterotrophic dinophysiod dinoflagellates. Phycologia 33: 97-110.
38	Kaczmarska, I., LeGresley, M.M., Martin, J.L. and Ehrman, J. 2005. Diversity of the diatom genus Pseudo-nitzschia Peragallo in the Quoddy Region of the Bay of Fundy, Canada. Harmful Algae 4: 1-19.
39	Kaczmarska, I., Martin, J.L., Ehrman, J., and LeGresley, M.M. 2007. Pseudo-nitzschia species population dynamics in the Quoddy Region, Bay of Fundy. Harmful Algae 6: 861-874.
40	Martin, J.L., M.M.LeGresley and P.M. Strain. 2006. Plankton Monitoring in the Western Isles Region of the Bay of Fundy during 1999-2000. Can Tech Rept Fish Aquat. Sci. 2629. iv + 88 p.
